# Supplementary material for: Solid phase behavior of mixture systems based on tripalmitoyl glycerol and monounsaturated triacylglycerols forming a molecular compound
Source: Royal Society of Chemistry journal article supplement (doi:10.1039/d1cp05361b), 2022-01-01
Supplement: d1cp05361b1.pdf [file d1cp05361b1.pdf]

**Electronic Supplementary Material**

**For**

**Solid Phase Behavior of Mixture Systems Based on Tripalmitoyl Glycerol and  
Monounsaturated Triacylglycerols Forming a Molecular Compound**

Jorge Macridachis\*, Laura Bayés-García and Teresa Calvet

*Departament de Mineralogia, Petrologia i Geologia Aplicada, Facultat de Ciències de la Terra, Universitat de Barcelona, Martí i Franquès s/n,*

*E-08028 Barcelona, Spain.*

\* Correspondence: [jmacridachis@ub.edu](mailto:jmacridachis@ub.edu); Tel.: +34-934021350.

**Table S1.** Melting temperatures (°C) of stabilized PPP/PPO mixtures when heated at 2 °C·min<sup>-1</sup>.

| <b>Polymorph</b>   | PPP        | 95PPP      | 90PPP      | 85PPP      | 80PPP      | 75PPP      | 70PPP      | 65PPP      |
|--------------------|------------|------------|------------|------------|------------|------------|------------|------------|
| $\beta'$ -3L (PPO) | -          | -          | -          | -          | -          | -          | -          | 34.1 ± 0.5 |
| $\beta$ -2L (ss)   | 67.9 ± 0.7 | 66.4 ± 1.0 | 66.5 ± 0.7 | 65.8 ± 1.1 | 66.3 ± 2.0 | 64.3 ± 0.4 | 64.1 ± 0.7 | 63.2 ± 0.4 |
| <b>Polymorph</b>   | 60PPP      | 50PPP      | 40PPP      | 30PPP      | 20PPP      | 10PPP      | 5PPP       | PPO        |
| $\beta'$ -3L (PPO) | 35.8 ± 0.6 | 36.0 ± 1.0 | 35.2 ± 0.6 | 35.5 ± 0.8 | 35.5 ± 0.3 | 35.6 ± 0.6 | 36.0 ± 0.3 | 36.1 ± 1.3 |
| $\beta$ -2L (ss)   | 62.9 ± 0.5 | 61.9 ± 0.8 | 60.3 ± 0.9 | 58.3 ± 0.6 | 55.5 ± 0.4 | 51.8 ± 0.6 | 45.4 ± 0.4 | -          |

ss: solid solution

**Table S2.** Peak top temperatures (°C) of the main polymorphic events of PPP/PPO mixtures when heating at 2 °C·min<sup>-1</sup> soon after a melt crystallization process at the same rate.

| <b>PPP/PPO ratio</b> | <i><math>\alpha</math> (PPP) + <math>\beta'</math> (PPP) → <math>\beta</math> (PPP)</i> |  | <i><math>\beta</math> (PPP) melting</i>                            |  |                                            |                                                                    |                                         |
|----------------------|-----------------------------------------------------------------------------------------|--|--------------------------------------------------------------------|--|--------------------------------------------|--------------------------------------------------------------------|-----------------------------------------|
| 90/10                | 44.5 ± 0.4                                                                              |  | 65.6 ± 0.6                                                         |  |                                            |                                                                    |                                         |
|                      | <i><math>\beta'_2</math> (PPO) melting</i>                                              |  | <i><math>\beta'</math> (PPP) → <math>\beta</math> (PPP)</i>        |  | <i><math>\beta</math> (PPP) melting</i>    |                                                                    |                                         |
| 80/20                | 31.2 ± 0.8                                                                              |  | 41.6 ± 0.3                                                         |  | 65.0 ± 0.4                                 |                                                                    |                                         |
| 70/30                | 30.9 ± 0.5                                                                              |  | 39.5 ± 1.2                                                         |  | 63.9 ± 0.6                                 |                                                                    |                                         |
| 60/40                | 30.5 ± 1.1                                                                              |  | 39.0 ± 0.7                                                         |  | 62.7 ± 0.9                                 |                                                                    |                                         |
|                      | <i><math>\beta'_2</math> (PPO) melting</i>                                              |  | <i><math>\beta'</math> (PPP) → melt → <math>\beta</math> (PPP)</i> |  | <i><math>\beta</math> (PPP) melting</i>    |                                                                    |                                         |
| 50/50                | 30.6 ± 0.8                                                                              |  | 42.4 ± 0.4                                                         |  | 61.7 ± 0.6                                 |                                                                    |                                         |
| 40/60                | 30.4 ± 0.6                                                                              |  | 40.5 ± 0.4                                                         |  | 60.0 ± 0.4                                 |                                                                    |                                         |
| 30/70                | 30.3 ± 0.6                                                                              |  | 39.3 ± 0.6                                                         |  | 57.6 ± 0.8                                 |                                                                    |                                         |
| 20/80                | 31.2 ± 0.7                                                                              |  | 39.4 ± 0.4                                                         |  | 55.3 ± 0.4                                 |                                                                    |                                         |
|                      | <i><math>\alpha_1</math> (PPO) melting</i>                                              |  | <i><math>\beta'_2</math> (PPO) crystallization</i>                 |  | <i><math>\beta'_2</math> (PPO) melting</i> | <i><math>\beta'</math> (PPP) → melt → <math>\beta</math> (PPP)</i> | <i><math>\beta</math> (PPP) melting</i> |
| 10/90                | 18.8 ± 0.3                                                                              |  | 19.7 ± 0.4                                                         |  | 31.4 ± 0.3                                 | 41.5 ± 0.6                                                         | 49.6 ± 0.5                              |

**Table S3.** Melting temperatures (°C) of stabilized PPP/MC<sub>POP/PPO</sub> mixtures when heated at 2 °C·min<sup>-1</sup>.

| <b>Polymorph</b>              | PPP        | 95PPP      | 90PPP      | 85PPP      | 80PPP      | 75PPP      | 70PPP      | 65PPP      | 60PPP      | 55PPP                 | 50PPP      |
|-------------------------------|------------|------------|------------|------------|------------|------------|------------|------------|------------|-----------------------|------------|
| β-2L (MC <sub>POP/PPO</sub> ) | -          | -          | -          | -          | -          | -          | -          | -          | 32.8 ± 0.4 | 33.4 ± 1.2            | 33.2 ± 0.5 |
| β-2L (ss)                     | 67.5 ± 0.6 | 66.4 ± 0.6 | 66.0 ± 0.5 | 65.7 ± 0.5 | 65.6 ± 1.5 | 65.0 ± 0.6 | 64.7 ± 1.0 | 63.4 ± 0.9 | 62.7 ± 0.4 | 62.0 ± 0.5            | 61.4 ± 0.8 |
| <b>Polymorph</b>              | 45PPP      | 40PPP      | 35PPP      | 30PPP      | 25PPP      | 20PPP      | 15PPP      | 10PPP      | 5PPP       | MC <sub>POP/PPO</sub> |            |
| β-2L (MC <sub>POP/PPO</sub> ) | 33.3 ± 0.2 | 33.7 ± 0.4 | 33.1 ± 0.3 | 33.6 ± 0.7 | 33.5 ± 0.6 | 33.6 ± 0.5 | 33.6 ± 0.8 | 33.2 ± 0.8 | 33.6 ± 0.6 | 33.6 ± 0.4            |            |
| β-2L (ss)                     | 60.4 ± 0.6 | 59.7 ± 0.4 | 58.2 ± 0.3 | 58.2 ± 0.6 | 56.4 ± 0.6 | 54.5 ± 0.8 | 52.9 ± 0.7 | 49.6 ± 1.0 | 43.7 ± 0.6 | -                     |            |

ss: solid solution

**Table S4.** Peak top temperatures (°C) of the main polymorphic events of PPP/MC<sub>POP/PPO</sub> mixtures when heating at 2 °C·min<sup>-1</sup> soon after a melt crystallization process at the same rate.

| <b>PPP/MC<sub>POP/PPO</sub> ratio</b> | <i>α (PPP) + β' (PPP) → β (PPP)</i>                                |                                          | <i>β (PPP) melting</i>           |                        |  |  |
|---------------------------------------|--------------------------------------------------------------------|------------------------------------------|----------------------------------|------------------------|--|--|
|                                       | 90/10                                                              | 44.1 ± 0.3                               |                                  | 65.5 ± 0.5             |  |  |
| 80/20                                 | 40.6 ± 0.3                                                         |                                          | 64.5 ± 0.3                       |                        |  |  |
|                                       | <i>α (MC<sub>POP/PPO</sub>) melting</i>                            | <i>β' (MC<sub>POP/PPO</sub>) melting</i> | <i>β' (PPP) → β (PPP)</i>        | <i>β (PPP) melting</i> |  |  |
| 70/30                                 | 14.6 ± 0.3                                                         | 28.6 ± 1.1                               | 39.4 ± 0.6                       | 63.5 ± 0.6             |  |  |
| 60/40                                 | 14.7 ± 0.3                                                         | 28.5 ± 0.4                               | 38.7 ± 0.4                       | 62.6 ± 0.4             |  |  |
|                                       | <i>α (MC<sub>POP/PPO</sub>) melting</i>                            | <i>β' (MC<sub>POP/PPO</sub>) melting</i> | <i>β' (PPP) → melt → β (PPP)</i> | <i>β (PPP) melting</i> |  |  |
| 50/50                                 | 14.7 ± 0.5                                                         | 28.0 ± 0.3                               | 39.8 ± 0.2                       | 61.1 ± 0.5             |  |  |
| 40/60                                 | 14.7 ± 0.3                                                         | 28.0 ± 0.4                               | 40.3 ± 0.4                       | 59.7 ± 0.3             |  |  |
| 30/70                                 | 14.9 ± 0.3                                                         | 27.2 ± 0.6                               | 37.0 ± 0.9                       | 57.3 ± 0.5             |  |  |
| 20/80                                 | 15.1 ± 0.4                                                         | 27.2 ± 0.5                               | 34.0 ± 0.5                       | 54.6 ± 0.7             |  |  |
|                                       | <i>α (MC<sub>POP/PPO</sub>) → melt → β' (MC<sub>POP/PPO</sub>)</i> | <i>β' (MC<sub>POP/PPO</sub>) melting</i> | <i>β' (PPP) → melt → β (PPP)</i> | <i>β (PPP) melting</i> |  |  |
| 10/90                                 | 15.5 ± 0.5                                                         | 28.0 ± 0.5                               | 34.6 ± 1.2                       | 48.9 ± 0.6             |  |  |

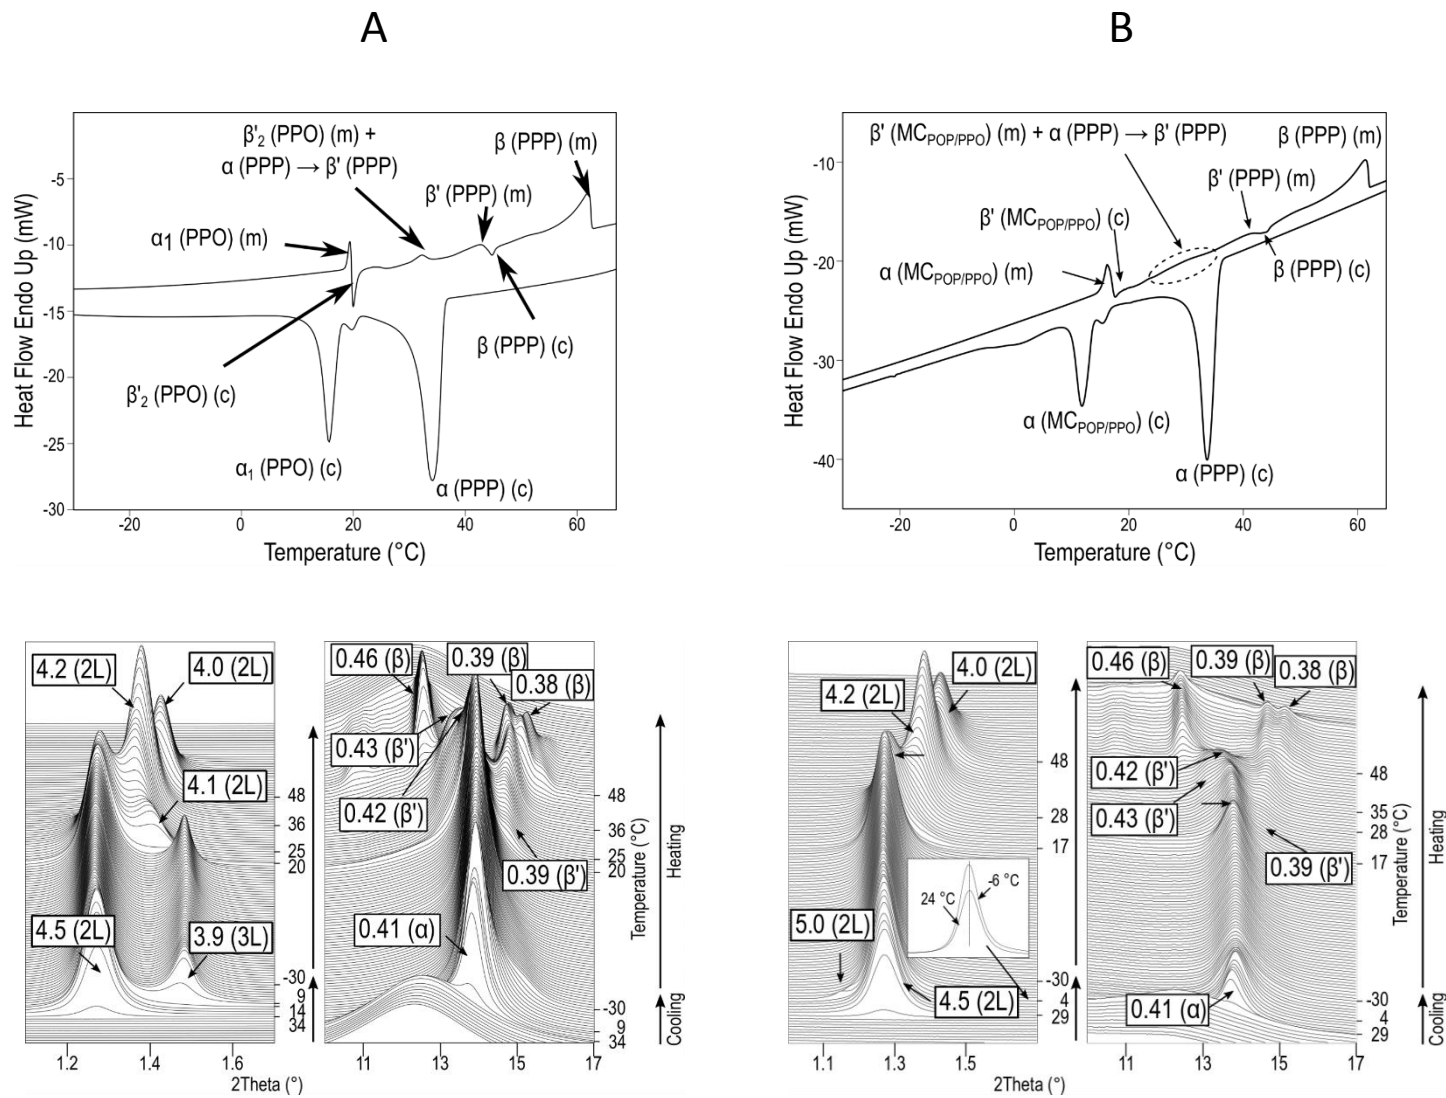

**Figure S1.** DSC thermograms (up) and SR-XRD patterns (down) obtained when equimolecular (A) PPP/PPO and (B) PPP/MCPOP/PPPO mixtures were cooled to -30 °C at 15 °C·min<sup>-1</sup> and subsequently heated at 2 °C·min<sup>-1</sup>. (c): crystallization; (m): melting. *d*-spacing values are given in nm.
